# Supplementary material
Source: PubMed Central journal article supplement (PMC5203985)
Supplement: NIHMS674461-supplement-MM5.pdf [file NIHMS674461-supplement-MM5.pdf]

| Supplementary Table 2 - List of proteins increasing over storage probably from platelets or WBCs |                                                          | Female   |          | Male     |       |  |
|--------------------------------------------------------------------------------------------------|----------------------------------------------------------|----------|----------|----------|-------|--|
|                                                                                                  |                                                          | Day 1    | Day 5    | Day 1    | Day 5 |  |
| 1                                                                                                | Isoform 1 of Serum albumin*                              | 3078.611 | 4667.693 | 3388.898 | 5160  |  |
| 2                                                                                                | Complement C3*                                           | 925.472  | 1398.456 | 930.4455 | 1490  |  |
| 3                                                                                                | Isoform Gamma-A of Fibrinogen gamma chain*               | 910.782  | 1036.236 | 927.3915 | 867   |  |
| 4                                                                                                | Complement component 4B                                  | 651.6078 | 888.0555 | 741.0988 | 1223  |  |
| 5                                                                                                | Isoform 1 of Alpha-1-antitrypsin                         | 351.5115 | 484.6745 | 511.0324 | 619   |  |
| 6                                                                                                | Putative immunoglobulin heavy constant gamma 1           | 230.8434 | 445.5713 | 120.1232 | 225   |  |
| 7                                                                                                | Angiotensin II receptor                                  | 158.4425 | 331.3486 | 111.9792 | 227   |  |
| 8                                                                                                | Talin-1                                                  | 72.4009  | 218.155  | 70.2415  | 235   |  |
| 9                                                                                                | Isoform 1 of Filamin-A                                   | 68.2037  | 245.9389 | 27.4858  | 165   |  |
| 10                                                                                               | Thrombospondin-1                                         | 44.0701  | 411.6132 | 51.9176  | 406   |  |
| 11                                                                                               | Isoform 2 of Apolipoprotein L1                           | 38.8237  | 49.3936  | 50.8996  | 58    |  |
| 12                                                                                               | Isoform 2 of Fibrinogen alpha chain*                     | 36.7251  | 139.9485 | 0        | 0     |  |
| 13                                                                                               | Putative Putative uncharacterized protein                | 36.7251  | 59.6839  | 47.8457  | 44    |  |
| 14                                                                                               | Lambda light chain of human immunoglobulin surface       | 34.6265  | 48.3646  | 39.7017  | 28    |  |
| 15                                                                                               | Oxysterol-binding protein                                | 33.5772  | 43.2194  | 35.6297  | 55    |  |
| 16                                                                                               | Isoform 1 of Haptoglobin-related protein                 | 30.4294  | 40.1323  | 44.7917  | 59    |  |
| 17                                                                                               | Coagulation factor XIII A chain                          | 28.3308  | 36.0162  | 34.6118  | 54    |  |
| 18                                                                                               | Platelet basic protein                                   | 27.2815  | 84.3807  | 28.5038  | 78    |  |
| 19                                                                                               | Platelet glycoprotein Ib alpha polypeptide (Fragment)    | 26.2322  | 45.2775  | 16.2879  | 34    |  |
| 20                                                                                               | Properdin                                                | 25.1829  | 29.842   | 21.3778  | 25    |  |
| 21                                                                                               | L-lactate dehydrogenase B chain                          | 25.1829  | 47.3355  | 32.5758  | 38    |  |
| 22                                                                                               | Isoform 1 of L-lactate dehydrogenase A chain             | 22.035   | 34.9871  | 18.3239  | 42    |  |
| 23                                                                                               | Putative immunoglobulin heavy constant alpha 1           | 19.9365  | 66.8871  | 21.3778  | 22    |  |
| 24                                                                                               | Apolipoprotein A-II*                                     | 19.9365  | 28.8129  | 22.3958  | 21    |  |
| 25                                                                                               | Sarcoma antigen NY-SAR-29 (Fragment)                     | 17.8379  | 33.9581  | 4.072    | 12    |  |
| 26                                                                                               | Lymphatic vessel endothelial hyaluronic acid receptor 1  | 17.8379  | 21.6097  | 19.3419  | 20    |  |
| 27                                                                                               | Isoform C of Proteoglycan 4                              | 16.7886  | 51.4516  | 38.6837  | 30    |  |
| 28                                                                                               | 2-oxoglutarate and iron-dependent oxygenase domain-      | 15.7393  | 21.6097  | 18.3239  | 17    |  |
| 29                                                                                               | Fructose-bisphosphate aldolase A                         | 15.7393  | 29.842   | 23.4138  | 33    |  |
| 30                                                                                               | Isoform 1 of Peptidase inhibitor 16                      | 14.69    | 22.6387  | 15.2699  | 9     |  |
| 31                                                                                               | Fetuin-B                                                 | 14.69    | 19.5516  | 13.2339  | 13    |  |
| 32                                                                                               | Apolipoprotein C-I                                       | 14.69    | 15.4355  | 15.2699  | 17    |  |
| 33                                                                                               | 14-3-3 protein zeta/delta                                | 14.69    | 29.842   | 15.2699  | 45    |  |
| 34                                                                                               | Profilin-1                                               | 14.69    | 29.842   | 10.1799  | 36    |  |
| 35                                                                                               | Pleckstrin                                               | 13.6407  | 31.9     | 12.2159  | 23    |  |
| 36                                                                                               | ficolin (collagen/fibrinogen domain containing lectin) 2 | 13.6407  | 15.4355  | 17.3059  | 23    |  |
| 37                                                                                               | Isoform 1 of Alpha-actinin-1                             | 12.5915  | 103.9323 | 18.3239  | 75    |  |
| 38                                                                                               | Glutathione S-transferase omega-1                        | 12.5915  | 20.5807  | 12.2159  | 19    |  |
| 39                                                                                               | Isoform 1 of Vinculin                                    | 12.5915  | 59.6839  | 12.2159  | 52    |  |
| 40                                                                                               | Peptidyl-prolyl cis-trans isomerase A                    | 11.5422  | 28.8129  | 13.2339  | 19    |  |
| 41                                                                                               | Sodium/nucleoside cotransporter 2                        | 11.5422  | 67.9162  | 8.1439   | 47    |  |
| 42                                                                                               | von Willebrand factor                                    | 11.5422  | 49.3936  | 39.7017  | 162   |  |
| 43                                                                                               | Isoform 2 of Serine/threonine-protein kinase LMTK1       | 10.4929  | 49.3936  | 11.1979  | 14    |  |
| 44                                                                                               | Isoform 1 of Myosin-9                                    | 6.2957   | 138.9195 | 2.036    | 107   |  |
| 45                                                                                               | Complement C4 gamma chain (CO4A (Rodgers blood           | 0        | 179.0517 | 8.1439   | 8     |  |
| 46                                                                                               | Putative Ig kappa chain V-II region RPMI 6410            | 0        | 0        | 141.501  | 331   |  |
| 47                                                                                               | calcium binding protein 39-like                          | 0        | 78.2065  | 23.4138  | 64    |  |
