# Supplementary material
Source: PubMed Central journal article supplement (PMC5203985)

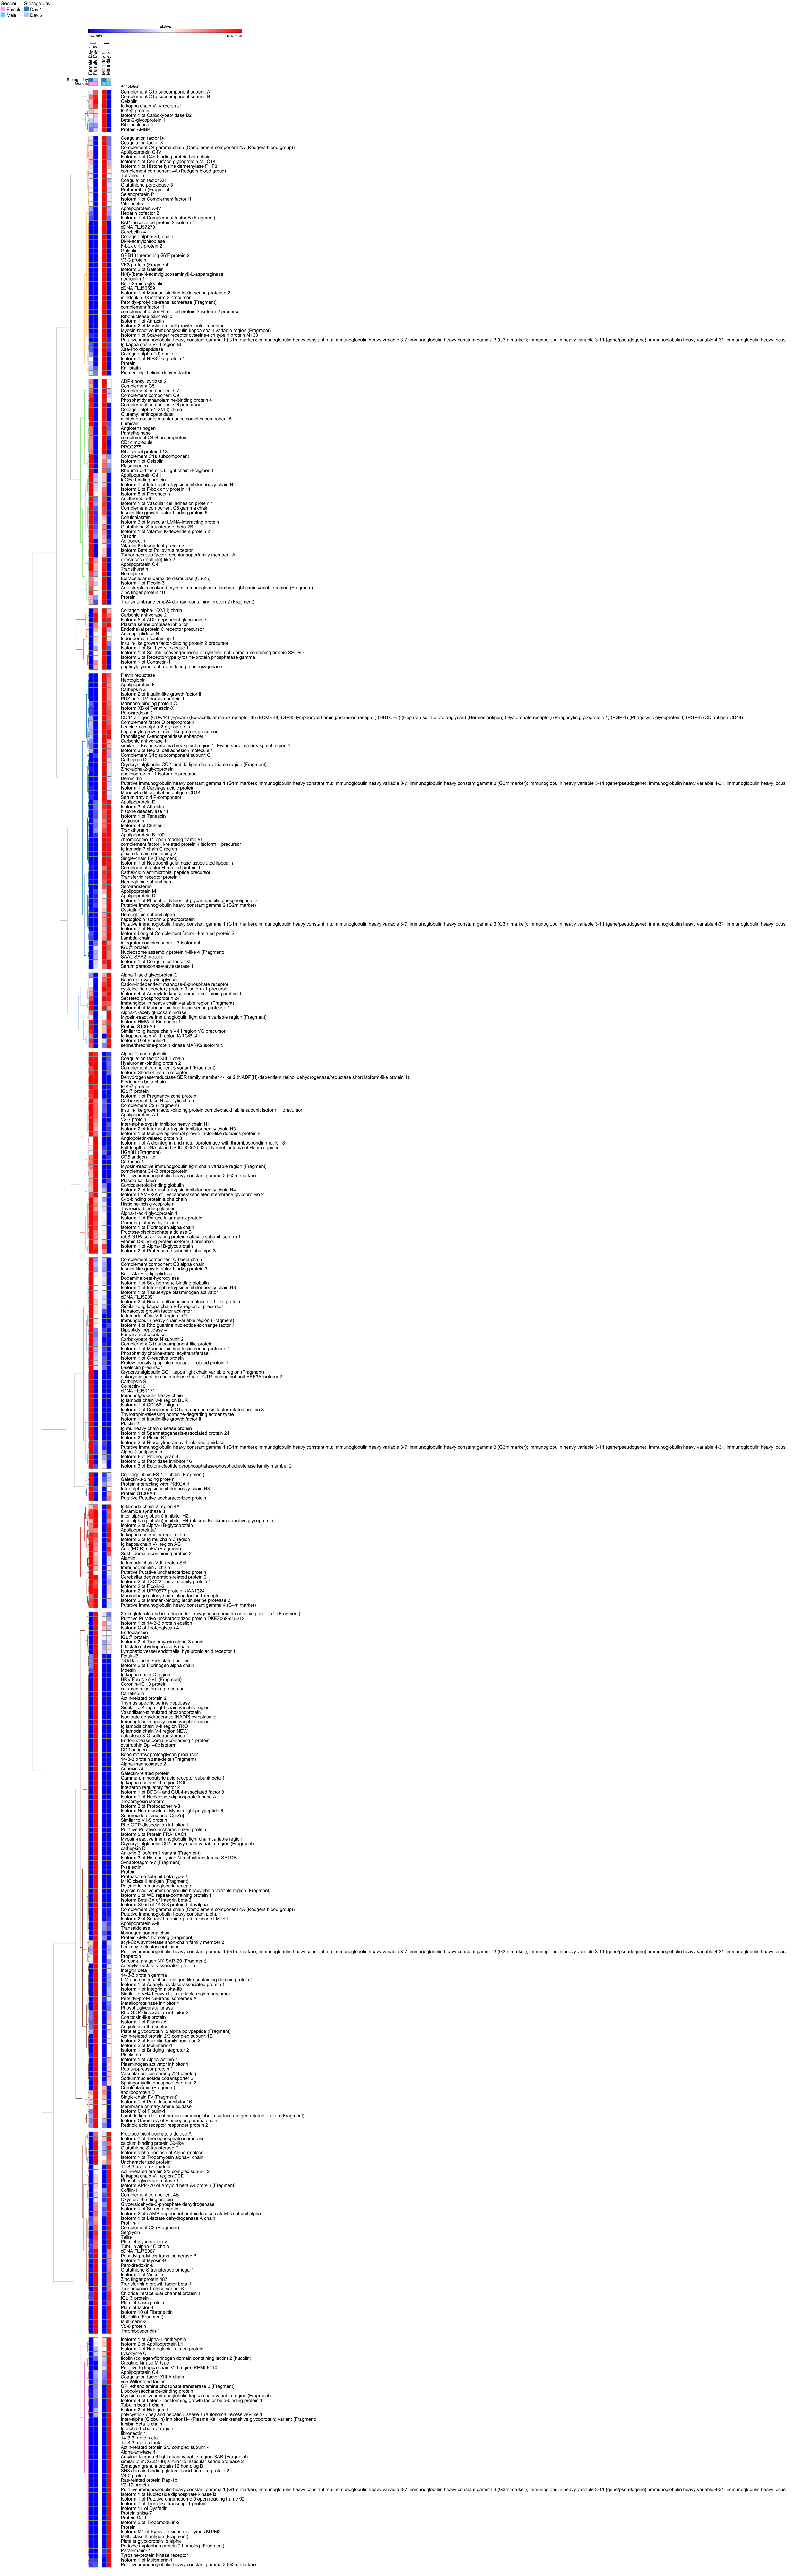

Supplement: NIHMS674461-supplement-MM2.pdf [file NIHMS674461-supplement-MM2.pdf]
